# Supplementary material
Source: HighWire-hosted journal article supplement (https://www.cmajopen.ca/highwire/filestream/80774/field_highwire_adjunct_files/1/open-2014-0005-2-at.pdf)
Supplement: open-2014-0005-2-at.pdf [file open-2014-0005-2-at.pdf]

**Appendix 2 (as supplied by the authors): Number of cancer cases by cancer type, 5-year period, age group and sex, Alberta, Canada, 1975–2009\***

\*When there were fewer than 5 cases in a category, "< 5" was used to preserve confidentiality.

**Anus**

| Age group | 1975-79 |    | 1980-84 |    | 1985-89 |    | 1990-94 |    | 1995-99 |    | 2000-04 |    | 2005-09 |    |
|-----------|---------|----|---------|----|---------|----|---------|----|---------|----|---------|----|---------|----|
|           | F       | M  | F       | M  | F       | M  | F       | M  | F       | M  | F       | M  | F       | M  |
| <35       | <5      | <5 | <5      | <5 | <5      | <5 | 9       | 6  | 10      | 7  | 14      | 8  | 8       | 7  |
| 35-44     | <5      | <5 | <5      | <5 | 5       | 5  | 8       | 7  | 10      | 7  | 20      | 16 | 44      | 12 |
| 45-54     | 7       | <5 | 12      | 5  | 7       | 9  | 9       | 5  | 17      | 7  | 23      | 12 | 44      | 18 |
| 55-64     | <5      | <5 | 13      | <5 | 8       | 9  | 13      | 8  | 11      | 14 | 15      | 13 | 21      | 18 |
| 65-74     | <5      | <5 | 9       | <5 | 9       | <5 | 10      | 8  | 17      | 6  | 20      | 8  | 11      | 12 |
| 75-84     | <5      | <5 | <5      | <5 | 5       | <5 | 9       | <5 | 6       | <5 | 8       | <5 | 7       | <5 |
| 85+       | <5      | <5 | <5      | <5 | 5       | <5 | 9       | <5 | 6       | <5 | 8       | <5 | 7       | <5 |

**Cervix**

| Age group | 1975-79 | 1980-84 | 1985-89 | 1990-94 | 1995-99 | 2000-04 | 2005-09 |
|-----------|---------|---------|---------|---------|---------|---------|---------|
|           | F       | F       | F       | F       | F       | F       | F       |
| <35       | 119     | 162     | 148     | 181     | 136     | 198     | 179     |
| 35-44     | 111     | 143     | 173     | 192     | 222     | 219     | 234     |
| 45-54     | 93      | 84      | 86      | 114     | 103     | 188     | 162     |
| 55-64     | 81      | 56      | 66      | 83      | 71      | 101     | 91      |
| 65-74     | 64      | 52      | 70      | 76      | 50      | 57      | 59      |
| 75-84     | 29      | 34      | 36      | 35      | 36      | 43      | 32      |
| 85+       | 10      | 10      | 7       | 17      | 17      | 11      | 16      |

**Oropharynx**

| Age group | 1975-79 |    | 1980-84 |    | 1985-89 |    | 1990-94 |    | 1995-99 |    | 2000-04 |    | 2005-09 |     |
|-----------|---------|----|---------|----|---------|----|---------|----|---------|----|---------|----|---------|-----|
|           | F       | M  | F       | M  | F       | M  | F       | M  | F       | M  | F       | M  | F       | M   |
| <35       | <5      | <5 | <5      | <5 | <5      | 9  | <5      | 12 | <5      | 17 | <5      | 24 | 6       | 23  |
| 35-44     | 5       | 17 | 6       | 18 | 6       | 14 | 6       | 29 | 7       | 37 | 25      | 92 | 14      | 117 |
| 45-54     | 8       | 31 | 7       | 17 | 13      | 30 | 10      | 29 | 13      | 42 | 24      | 64 | 20      | 137 |
| 55-64     | 10      | 19 | 11      | 16 | 9       | 21 | 14      | 33 | 14      | 38 | 25      | 47 | 20      | 69  |
| 65-74     | <5      | 6  | 5       | <5 | 6       | 7  | 10      | 12 | 9       | 16 | 11      | 16 | 17      | 16  |
| 75-84     | <5      | <5 | <5      | <5 | <5      | <5 | <5      | <5 | <5      | <5 | <5      | <5 | 6       | <5  |
| 85+       | <5      | <5 | <5      | <5 | <5      | <5 | <5      | <5 | <5      | <5 | <5      | <5 | 6       | <5  |

**Vulva**

| Age group | 1975-79 | 1980-84 | 1985-89 | 1990-94 | 1995-99 | 2000-04 | 2005-09 |
|-----------|---------|---------|---------|---------|---------|---------|---------|
|           | F       | F       | F       | F       | F       | F       | F       |
| <35       | <5      | <5      | <5      | 7       | 8       | <5      | 5       |
| 35-44     | <5      | 6       | 14      | 11      | 26      | 20      | 19      |
| 45-54     | 9       | <5      | 13      | 12      | 21      | 17      | 42      |
| 55-64     | 11      | 14      | 10      | 21      | 14      | 17      | 23      |
| 65-74     | 16      | 11      | 12      | 20      | 31      | 31      | 32      |
| 75-84     | 21      | 23      | 20      | 20      | 31      | 30      | 38      |
| 85+       | 7       | 11      | 10      | 13      | 8       | 25      | 27      |

**Vagina**

| Age group | 1975-79 | 1980-84 | 1985-89 | 1990-94 | 1995-99 | 2000-04 | 2005-09 |
|-----------|---------|---------|---------|---------|---------|---------|---------|
|           | F       | F       | F       | F       | F       | F       | F       |
| <35       | <5      | <5      | <5      | <5      | 10      | 6       | <5      |
| 35-44     | <5      | <5      | 7       | <5      | 8       | 13      | 10      |
| 45-54     | 8       | 10      | 8       | 9       | <5      | 12      | 11      |
| 55-64     | 7       | 5       | 12      | 6       | 10      | 14      | 7       |
| 65-74     | <5      | 6       | 6       | 7       | 17      | 8       | 11      |
| 75-84     | <5      | <5      | <5      | <5      | <5      | <5      | <5      |
| 85+       | <5      | <5      | <5      | <5      | <5      | <5      | <5      |

*continued*

**Penis**

| Age group | 1975-79 | 1980-84 | 1985-89 | 1990-94 | 1995-99 | 2000-04 | 2005-09 |
|-----------|---------|---------|---------|---------|---------|---------|---------|
|           | M       | M       | M       | M       | M       | M       | M       |
| <35       | <5      | <5      | <5      | <5      | <5      | <5      | <5      |
| 35-44     | <5      | 5       | <5      | <5      | 5       | <5      | <5      |
| 45-54     | 5       | 8       | <5      | <5      | 10      | 12      | 7       |
| 55-64     | 5       | 8       | 8       | 5       | 17      | 18      | 18      |
| 65-74     | 8       | 12      | 5       | 8       | 14      | 16      | 19      |
| 75-84     | <5      | 9       | 9       | 8       | 12      | 10      | 13      |
| 85+       | <5      | <5      | <5      | <5      | <5      | <5      | 6       |

**Lung**

| Age group | 1975-79 |     | 1980-84 |     | 1985-89 |      | 1990-94 |      | 1995-99 |      | 2000-04 |      | 2005-09 |      |
|-----------|---------|-----|---------|-----|---------|------|---------|------|---------|------|---------|------|---------|------|
|           | F       | M   | F       | M   | F       | M    | F       | M    | F       | M    | F       | M    | F       | M    |
| <35       | 7       | 9   | 12      | 10  | 11      | 7    | 19      | 7    | 9       | 6    | 8       | 10   | 12      | 6    |
| 35-44     | 29      | 59  | 53      | 56  | 59      | 62   | 72      | 63   | 77      | 69   | 86      | 62   | 62      | 39   |
| 45-54     | 122     | 236 | 172     | 275 | 209     | 306  | 270     | 235  | 310     | 307  | 335     | 347  | 453     | 362  |
| 55-64     | 164     | 586 | 311     | 719 | 429     | 806  | 489     | 913  | 669     | 845  | 786     | 857  | 1040    | 949  |
| 65-74     | 147     | 726 | 279     | 919 | 490     | 1086 | 703     | 1380 | 900     | 1466 | 1098    | 1462 | 1296    | 1606 |
| 75-84     | 79      | 399 | 115     | 584 | 262     | 779  | 393     | 853  | 620     | 996  | 931     | 1189 | 1092    | 1428 |
| 85+       | 27      | 77  | 48      | 100 | 58      | 140  | 76      | 168  | 135     | 214  | 232     | 242  | 337     | 341  |

**Endometrium**

| Age group | 1975-79 | 1980-84 | 1985-89 | 1990-94 | 1995-99 | 2000-04 | 2005-09 |
|-----------|---------|---------|---------|---------|---------|---------|---------|
|           | F       | F       | F       | F       | F       | F       | F       |
| <35       | 8       | 10      | 15      | 11      | 18      | 25      | 14      |
| 35-44     | 33      | 32      | 67      | 57      | 81      | 105     | 107     |
| 45-54     | 157     | 115     | 155     | 159     | 227     | 311     | 345     |
| 55-64     | 398     | 301     | 332     | 311     | 416     | 507     | 723     |
| 65-74     | 183     | 240     | 349     | 343     | 372     | 386     | 429     |
| 75-84     | 88      | 99      | 149     | 184     | 215     | 240     | 227     |
| 85+       | 14      | 18      | 26      | 41      | 66      | 58      | 76      |

**Ovary**

| Age group | 1975-79 | 1980-84 | 1985-89 | 1990-94 | 1995-99 | 2000-04 | 2005-09 |
|-----------|---------|---------|---------|---------|---------|---------|---------|
|           | F       | F       | F       | F       | F       | F       | F       |
| <35       | 39      | 67      | 79      | 105     | 61      | 41      | 42      |
| 35-44     | 41      | 81      | 82      | 115     | 136     | 97      | 77      |
| 45-54     | 135     | 107     | 130     | 163     | 183     | 166     | 197     |
| 55-64     | 132     | 159     | 160     | 171     | 168     | 207     | 185     |
| 65-74     | 113     | 135     | 168     | 183     | 192     | 172     | 165     |
| 75-84     | 53      | 65      | 82      | 119     | 143     | 147     | 155     |
| 85+       | 12      | 26      | 26      | 33      | 46      | 63      | 72      |

**Colon**

| Age group | 1975-79 |     | 1980-84 |     | 1985-89 |     | 1990-94 |     | 1995-99 |     | 2000-04 |     | 2005-09 |     |
|-----------|---------|-----|---------|-----|---------|-----|---------|-----|---------|-----|---------|-----|---------|-----|
|           | F       | M   | F       | M   | F       | M   | F       | M   | F       | M   | F       | M   | F       | M   |
| <35       | 13      | 17  | 12      | 19  | 20      | 15  | 13      | 9   | 12      | 13  | 10      | 24  | 24      | 26  |
| 35-44     | 41      | 41  | 38      | 43  | 41      | 38  | 54      | 52  | 67      | 61  | 65      | 68  | 59      | 77  |
| 45-54     | 119     | 95  | 101     | 119 | 107     | 131 | 104     | 140 | 142     | 180 | 210     | 243 | 249     | 308 |
| 55-64     | 207     | 172 | 211     | 250 | 270     | 337 | 233     | 335 | 277     | 390 | 370     | 483 | 422     | 593 |
| 65-74     | 281     | 299 | 368     | 357 | 384     | 453 | 419     | 489 | 451     | 677 | 593     | 773 | 616     | 852 |
| 75-84     | 256     | 198 | 295     | 292 | 389     | 345 | 447     | 409 | 569     | 560 | 661     | 687 | 749     | 808 |
| 85+       | 99      | 77  | 147     | 97  | 196     | 105 | 224     | 140 | 261     | 175 | 361     | 194 | 419     | 203 |
